# Supplementary material
Source: HighWire-hosted journal article supplement (https://jcs.biologists.org/content/suppl/2008/10/18/121.21.3649)

**A**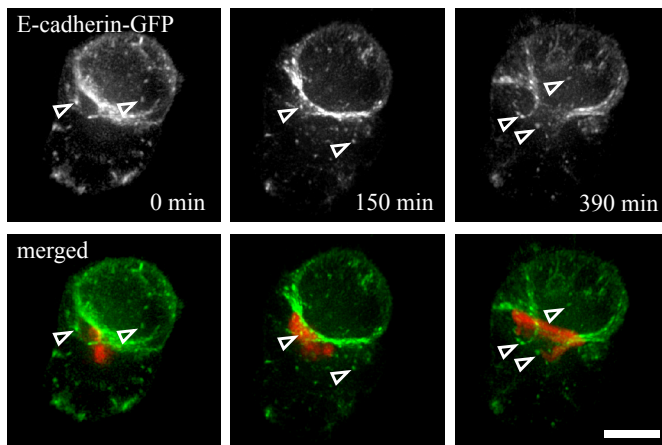**B**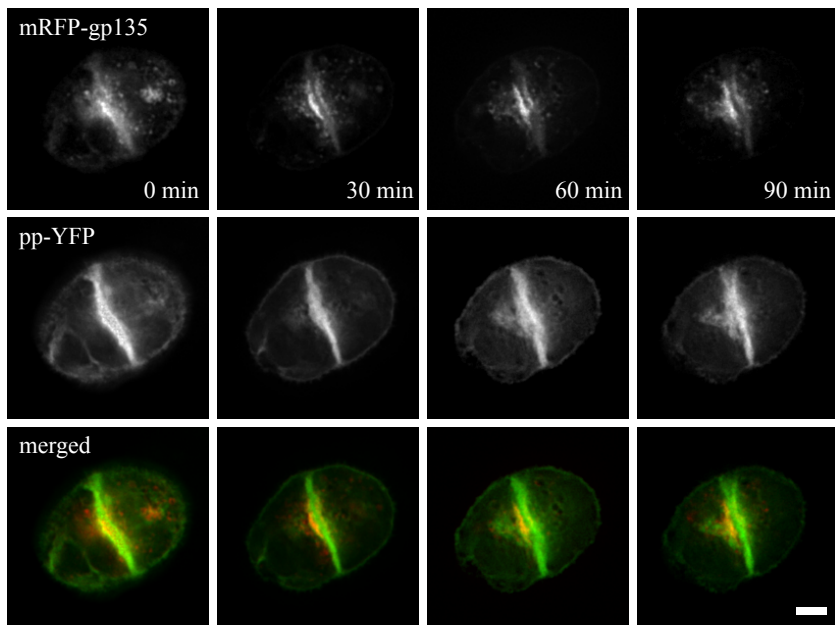

Supplement: 018648FigS3.pdf [file 018648FigS3.pdf]
